# Supplementary material
Source: publisher figshare collection journal article supplement (https://acs.figshare.com/ndownloader/files/4317283)

## Supporting Information

### Composition and Phase Tuned InGaAs Alloy Nanowires

Chan Su Jung, Han Sung Kim, Gyeong Bok Jung, Kang Jun Gong, Yong Jae Cho, So Young Jang, Chang Hyun Kim, Chi-Woo Lee, and Jeunghye Park

**Table S1:** Length (nm) of twin segments as a function of diameter and composition.

| $x$ | NW Diameter (nm) |     |     |     |     |
|-----|------------------|-----|-----|-----|-----|
|     | 40               | 60  | 80  | 100 | 120 |
| 0.3 |                  | 50  | 100 |     |     |
| 0.4 | 15               | 20  | 25  | 35  | 40  |
| 0.5 | 2                | 2.5 | 2.5 | 2.5 |     |
| 0.6 |                  | 50  |     | 100 |     |

**Table S2:** Composition and area fraction of two resolved XRD peaks (GaAs- and InAs-like components), and average mole fraction.

| $x$ | InAs-like |       |       | GaAs-like |       |       | $x_{avg}^1$ |
|-----|-----------|-------|-------|-----------|-------|-------|-------------|
|     | $2\theta$ | $x_1$ | $f_1$ | $2\theta$ | $x_2$ | $f_2$ |             |
| 0.2 | 26.8      | 0.28  | 0.23  | 27.0      | 0.17  | 0.77  | 0.17        |
| 0.3 | 26.7      | 0.34  | 0.36  | 26.9      | 0.23  | 0.64  | 0.27        |
| 0.4 | 26.5      | 0.45  | 0.48  | 26.6      | 0.40  | 0.52  | 0.42        |
| 0.5 | 26.0      | 0.74  | 0.32  | 26.5      | 0.45  | 0.68  | 0.54        |
| 0.6 | 26.2      | 0.62  | 0.64  | 26.4      | 0.51  | 0.36  | 0.58        |
| 0.8 | 25.8      | 0.85  | 0.82  | 26.0      | 0.74  | 0.18  | 0.83        |
| 0.9 | 25.7      | 0.91  | 0.87  | 25.9      | 0.80  | 0.13  | 0.89        |

$$^1 x_{avg} = x_1 f_1 + x_2 f_2$$

**Figure S1:** Diameter distribution of the  $\text{In}_x\text{Ga}_{1-x}\text{As}$  NWs with  $x = 0$  (GaAs), 0.3, 0.4, 0.5, 0.6, and 0.9.

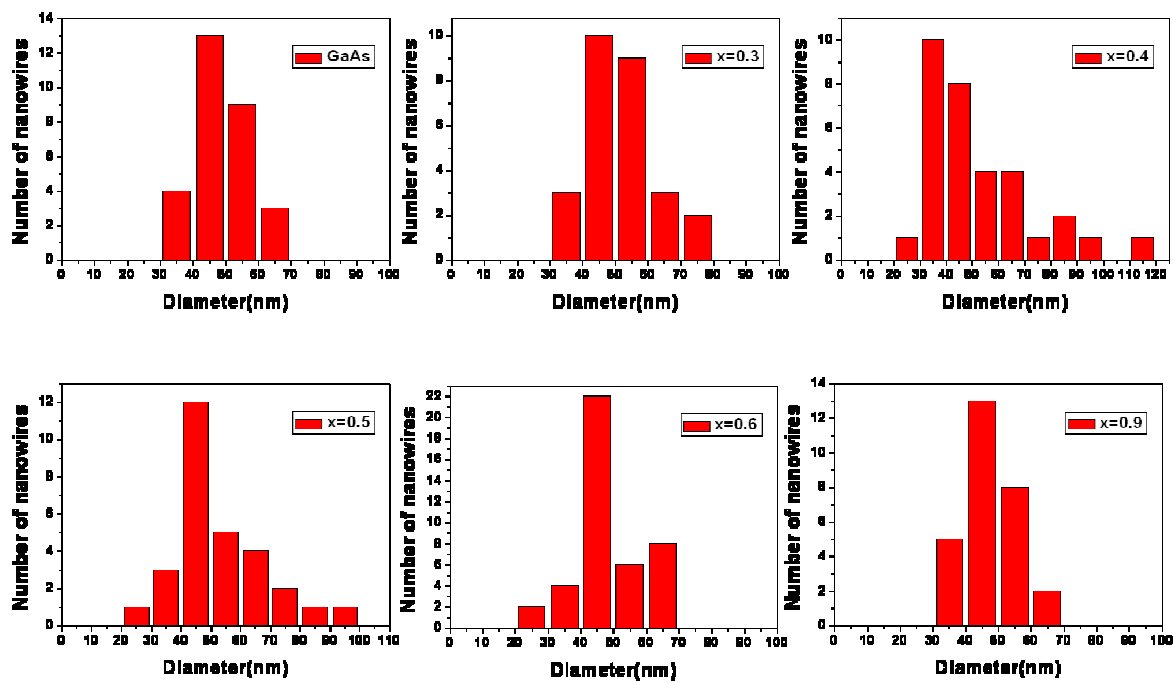

**Figure S2:** EDX data of the  $\text{In}_x\text{Ga}_{1-x}\text{As}$  NWs with (a)  $x = 0.05$ , (b) 0.1, (c) 0.2, (d) 0.3, (e) 0.4, (f) 0.5, (g) 0.6, (h) 0.7, (i) 0.8, and (j) 0.9. The HAADF STEM images are shown in the insets.

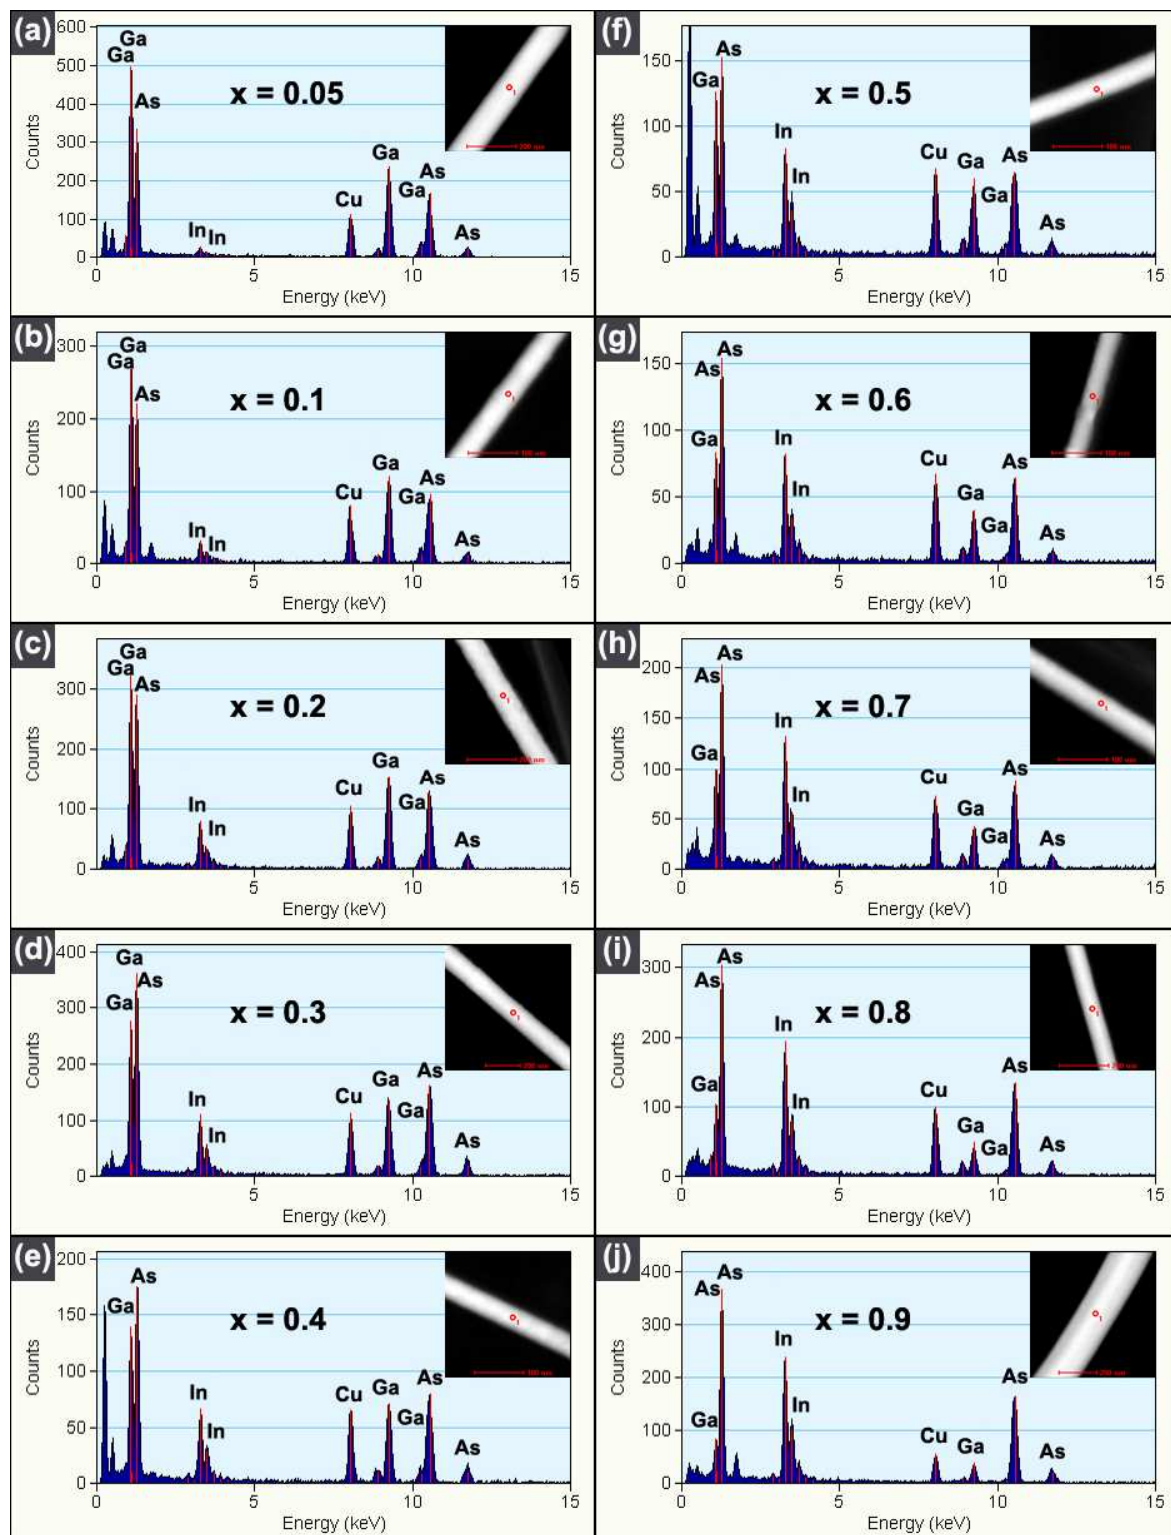

**Figure S3:** (a) Fine-scanned Ga  $2p_{3/2}$  peak of the GaAs and InGaAs alloy NWs.. The peak can thus be resolved into two bands at 1117 (PG1) and 1118 (PG2) eV, using a Voigt function. The binding energy of the Ga atoms bonded to the As atoms would be expected to appear at a lower energy compared to that of the Ga atoms bonded to the more electronegative O atoms. Therefore, the PG1 and PG2 bands can be assigned to the Ga-As and Ga-O bonding structures, respectively. The large fraction ( $> 70\%$ ) of the PG2 band is due to the  $\text{GaO}_x$  overlayers. (b) Finely scanned In  $3d_{5/2}$  peak of the InAs and InGaAs alloy NWs. Their peak was resolved into two bands at 444 (PI1) and 445 (PI2) eV, which were assigned to the In-As and In-O bonding structures, respectively. Compared to the Ga  $2p_{3/2}$  peak, the fraction of the oxide bonding structures is lower. This indicates that the overlayers mainly consisted of  $\text{GaO}_x$  composition, which is consistent with the EDX data.

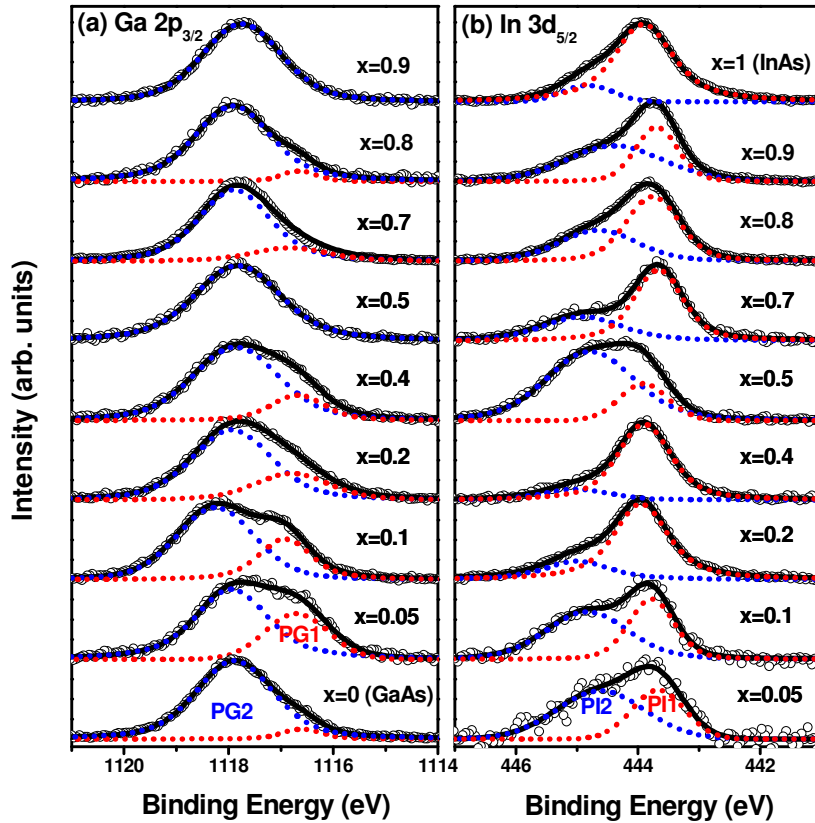

**Figure S4.** (a) Raman spectra of  $\text{In}_x\text{Ga}_{1-x}\text{As}$  ( $x = 0, 0.1, 0.2, 0.3, 0.5, 0.7, 0.9$ , and  $1$ ) NWs. The excitation wavelength is  $514.5 \text{ nm}$ . The GaAs ( $x = 0$ ) NWs exhibit TO (transverse optical) and LO (longitudinal optical) phonon modes at  $270$  and  $291 \text{ cm}^{-1}$ , respectively. The InAs ( $x = 1$ ) NWs exhibit TO and LO peaks at  $216$  and  $236 \text{ cm}^{-1}$ , respectively. The peak of the InGaAs alloy NWs was resolved into four bands using a Voigt function, *viz.* GaAs-like TO (blue) and LO (cyan) and InAs-like TO (red) and LO(magenta), clearly showing two-mode behavior throughout the composition range  $x = 0.1$ - $0.8$ . The black dotted line represents the sum of the resolved bands. The GaAs-like modes is dominant in the range of  $0 \leq x \leq 0.5$ , whereas the InAs-like mode is dominant in the range of  $0.5 \leq x < 1$ . At  $x = 0.5$ , two modes takes the nearly same fraction. As  $x$  approaches  $0.5$ , the FWHM of GaAs-like TO mode increases from  $12$  ( $x = 0$ ) to max.  $26 \text{ cm}^{-1}$ , while the InAs-like TO modes increases from  $17$  ( $x = 1$ ) to max.  $27 \text{ cm}^{-1}$ . The largest broadening around at  $x = 0.5$  indicates constantly the maximized crystalline disorder. (b) The optical phonon frequencies as a function of  $x$ . As  $x$  increases from  $0$  to  $0.7$ , the GaAs-like TO and LO modes show a large red shift,  $27$  and  $19 \text{ cm}^{-1}$ , respectively. In the case of the InAs-like modes, as  $x$  increases from  $0.2$  to  $1$ , they show  $10$  and  $15 \text{ cm}^{-1}$  red shift for LO and TO modes, respectively. The two-mode behavior of Raman scattering is quite consistent with previous works on the bulk film.<sup>1-</sup>

<sup>3</sup> In these previous works, similar to our result, as  $x$  increases, the optical phonon frequencies of both the GaAs- and InAs-like phases decrease almost linearly, with a more significant change for the GaAs-like phase. For comparison, we plotted the work of Groenen *et al.* in the figure.<sup>2</sup>

References:

- (1) Estrera, J. P.; Stevens, P. D.; Glosser, R.; Duncan, W. M.; Kao, Y. C.; Liu, H. Y.; Beam III, E. A. *Appl. Phys. Lett.* **1992**, *61*, 1927-1929.
- (2) Groenen, J.; Carles, R.; Landa, G.; Guerret-Piécourt, C.; Fontaine, C.; Gendry, M. *Phys. Rev. B* **1998**, *58*, 10452-10462.
- (3) Pagès, O.; Postnikov, A. V.; Kassem, M.; Chafi, A.; Nassour, A.; Doyen, S. *Phys. Rev. B* **2008**, *77*, 125208 1-9.

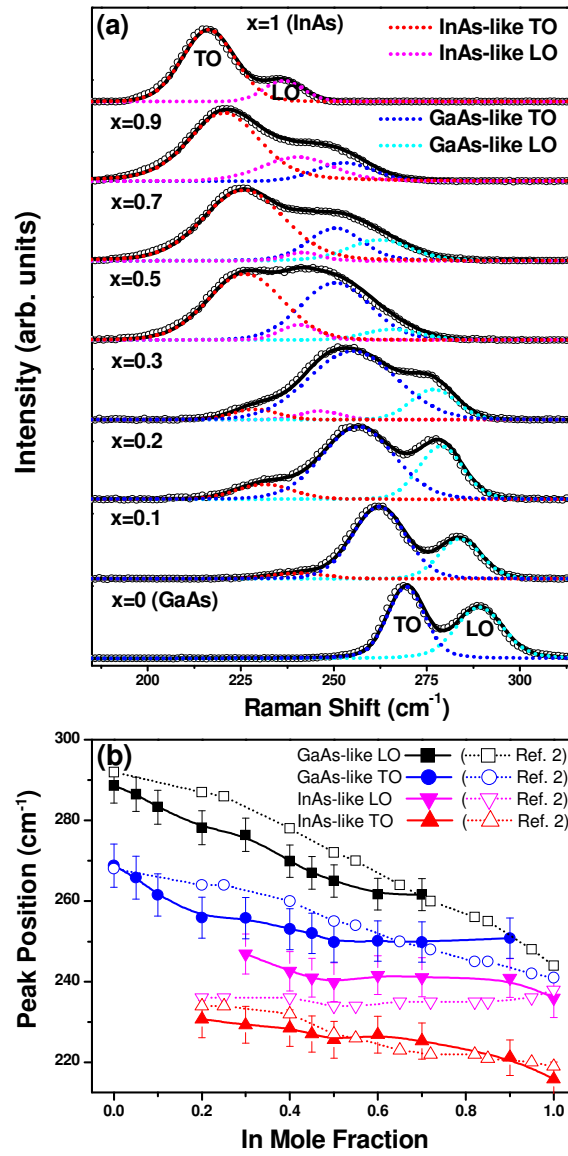

Supplement: Supplementary file 1 [file 4317283]
